# Supplementary material for: Comprehensive evaluation of AI in a large regional mammography screening program for breast cancer: detection, interval cancers, and radiologist workload
Source: Research Square preprint supplement (doi:10.21203/rs.3.rs-7487727/v1), 2025-09-05
Supplement: Supplementary file 1 [file c80e9f82e89649ebc5e3aafd.docx]

# Supplemental Material

| **Supplemental Table 1: Exclusions for screen-detected cancer characteristic analysis** | | |
| --- | --- | --- |
| **Category** | **Before AI (N=114,823)** | **With AI (N=156,151)** |
| Number of all cancers | 751 | 1218 |
|  | | |
| Number of invasive cancers | 625 | 985 |
| Exclusion criteria for cancer characteristic analysis of invasive cancers | | |
| NACT-patients | 55 (8.8%) | 71 (7.2%) |
| Non-carcinomas | 11 (1.8%) | 13 (1.3%) |
| Reanalyses from previous biopsy/specimen | 0 (0.0%) | 0 (0.0%) |
| Invasive cancers on biopsy, no residual cancer at surgery | 26 (4.2%) | 33 (3.4%) |
| Invasive cancers on biopsy, no surgeries | 12 (1.9%) | 15 (1.5%) |
| Invasive cancers on biopsy, only residual in situ component at surgery | 7 (1.1%) | 8 (0.8%) |
| Number of valid* invasive cancers | 541 | 878 |
|  | | |
| Number of in situ cancers | 126 | 233 |
| Exclusion criteria for cancer characteristic analysis of invasive cancers | | |
| NACT-patients | 0 (0.0%) | 1 (0.4%) |
| Pleomorphic/florid lobular variants | 2 (1.6%) | 12 (5.2%) |
| In situ carcinoma on biopsy, no residual in situ at surgery | 6 (4.8%) | 24 (10.3%) |
| In situ carcinoma on biopsy, no surgeries | 2 (1.6%) | 2 (0.9%) |
| In situ carcinoma on biopsy, invasive component at surgery | 0 (0.0%) | 1 (0.4%) |
| Number of valid* in situ cancers | 116 | 194 |
| *Valid for analysis of cancer characteristics. | | |

| **Supplemental Table 2: Exclusions for interval cancer characteristic analysis** | | |
| --- | --- | --- |
| **Category** | **Before AI (N=114,823)** | **With AI (N=66,492)** |
| Number of all cancers | 327 | 201 |
|  | | |
| Number of invasive cancers | 309 | 185 |
| Exclusion criteria for cancer characteristic analysis of invasive cancers | | |
| NACT-patients | 59 (19.1%) | 35 (18.9%) |
| Non-carcinomas | 21 (6.8%) | 4 (2.2%) |
| Reanalyses from previous biopsy/specimen | 4 (1.3%) | 2 (1.1%) |
| Invasive cancers on biopsy, no residual cancer at surgery | 18 (5.8%) | 23 (12.4%) |
| Invasive cancers on biopsy, no surgeries | 37 (12.0%) | 17 (9.2%) |
| Invasive cancers on biopsy, only residual in situ component at surgery | 3 (1.0%) | 1 (0.5%) |
| Number of valid* invasive cancers | 210 | 131 |
|  | | |
| Number of in situ cancers | 18 | 16 |
| Exclusion criteria for cancer characteristic analysis of in situ cancers | | |
| NACT-patients | 0 (0.0%) | 0 (0.0%) |
| Pleomorphic/florid lobular variants | 0 (0.0%) | 0 (0.0%) |
| In situ carcinoma on biopsy, no residual in situ at surgery | 1 (5.6%) | 1 (6.2%) |
| In situ carcinoma on biopsy, no surgeries | 0 (0.0%) | 1 (6.2%) |
| In situ carcinoma on biopsy, invasive component at surgery | 0 (0.0%) | 0 (0.0%) |
| Number of valid* in situ cancers | 17 | 14 |
| *Valid for analysis of cancer characteristics. | | |
